# Supplementary material for: Exploring Eye Movement Biometrics in Real-World Activities: A Case Study of Wayfinding
Source: MDPI journal article supplement (doi:10.3390/s22082949), 2022-04-12
Supplement: s1 [file s1]

**Table S1.** Descriptive statistics of fixation semantic features. FC: fixation count; FD: fixation duration (ms).

| Feature          | Distribution                                                                        | Mean  | SD    | Median | Range      |
|------------------|-------------------------------------------------------------------------------------|-------|-------|--------|------------|
| FC-bicycle       | 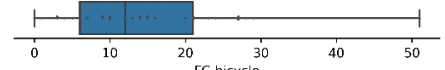   | 14.1  | 10.4  | 12.0   | 0 - 51     |
| FC-building      |    | 530.3 | 200.9 | 550.0  | 52 - 975   |
| FC-bus           |    | 2.2   | 2.3   | 2.0    | 0 - 9      |
| FC-car           |    | 447.3 | 152.7 | 456.0  | 82 - 801   |
| FC-fence         |    | 55.3  | 29.2  | 53.5   | 6 - 121    |
| FC-map           |    | 441.2 | 245.3 | 434.5  | 30 - 1035  |
| FC-motorcycle    |    | 14.7  | 8.1   | 13.5   | 2 - 34     |
| FC-person        |   | 214.7 | 100.5 | 222.0  | 26 - 390   |
| FC-pole          |  | 23.6  | 10.3  | 23.0   | 5 - 44     |
| FC-rider         |  | 11.2  | 8.2   | 10.0   | 1 - 32     |
| FC-road          |  | 744.3 | 303.8 | 744.5  | 185 - 1449 |
| FC-sidewalk      |  | 74.6  | 35.2  | 71.0   | 22 - 181   |
| FC-sky           |  | 22.2  | 23.1  | 13.5   | 1 - 82     |
| FC-terrain       |  | 11.3  | 9.1   | 10.0   | 1 - 45     |
| FC-traffic light |  | 0.1   | 0.2   | 0.0    | 0 - 1      |
| FC-traffic sign  |  | 9.3   | 10.0  | 7.5    | 0 - 58     |
| FC-train         |  | 0.6   | 1.1   | 0.0    | 0 - 4      |
| FC-truck         |  | 182.7 | 88.9  | 191.5  | 0 - 358    |
| FC-vegetation    |  | 702.7 | 317.3 | 714.0  | 48 - 1587  |

|                  |                                                                                     |          |         |          |                    |
|------------------|-------------------------------------------------------------------------------------|----------|---------|----------|--------------------|
| FC-wall          | 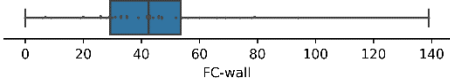   | 43.9     | 26.3    | 42.5     | 0 - 139            |
| FD-bicycle       |    | 3037.9   | 2598.1  | 2292.1   | 0 - 13927.3        |
| FD-building      |    | 115434.5 | 49833.2 | 111808.5 | 11963.8 - 227850.3 |
| FD-bus           |    | 449.1    | 495.8   | 324.5    | 0 - 2096.6         |
| FD-car           |    | 101046.3 | 38673.4 | 102145.6 | 17469.1 - 198245.3 |
| FD-fence         |    | 11627.5  | 6399.3  | 10142.9  | 1580.7 - 23076.9   |
| FD-map           |    | 114059.0 | 67310.6 | 107061.1 | 11719.4 - 279410.9 |
| FD-motorcycle    |    | 3117.6   | 1828.7  | 2737.9   | 216.1 - 7587.7     |
| FD-person        |   | 52442.0  | 28121.2 | 50030.6  | 5508.3 - 107038.4  |
| FD-pole          |  | 4664.6   | 2226.5  | 4467.0   | 499.1 - 9519.4     |
| FD-rider         |  | 2646.9   | 1966.9  | 2296.4   | 249.7 - 8136.6     |
| FD-road          |  | 174422.2 | 84150.7 | 172764.6 | 39894.2 - 356756.6 |
| FD-sidewalk      |  | 16301.9  | 8004.5  | 14632.8  | 3195.1 - 36109.7   |
| FD-sky           |  | 4406.6   | 4361.9  | 2861.5   | 83.7 - 14659.9     |
| FD-terrain       |  | 2512.1   | 2367.4  | 2146.6   | 103.3 - 12423.8    |
| FD-traffic light |  | 14.0     | 71.6    | 0.0      | 0 - 432.6          |
| FD-traffic sign  |  | 2127.0   | 2448.6  | 1647.3   | 0 - 13908.6        |
| FD-train         |  | 149.3    | 243.0   | 0.0      | 0 - 981.5          |
| FD-truck         |  | 38480.9  | 19081.4 | 39698.4  | 0 - 84765.3        |
| FD-vegetation    |  | 158014.4 | 76199.1 | 160650.4 | 11613.8 - 365008.2 |

FD-wall

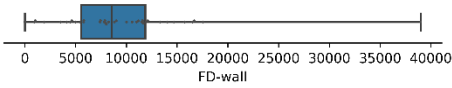

9589.9

6700.6

8528.9

0 - 38999.2
